# Supplementary material for: An efficient core–shell fluorescent silica nanoprobe for ratiometric fluorescence detection of pH in living cells
Source: Royal Society of Chemistry journal article supplement (doi:10.1039/c6an00981f), 2016-01-01
Supplement: c6an00981f1.pdf [file c6an00981f1.pdf]

## Electronic Supplementary Information

### **An efficient core-shell fluorescent silica nanoprobe for ratiometric fluorescence detection of pH in living cells**

Jingni Fu,<sup>a</sup> Changqin Ding,<sup>a</sup> Anwei Zhu,<sup>b\*</sup> and Yang Tian,<sup>a,b\*</sup>

<sup>a</sup> Department of Chemistry, Tongji University, Siping Road 1239, Shanghai 200092, China.

<sup>b</sup> School of Chemistry and Molecular Engineering, East China Normal University, 500 Dongchuan  
Road, Shanghai 200241, China.

Email: ytian@chem.ecnu.edu.cn; awzhu@chem.ecnu.edu.cn

Fax: +86 21 54341041; Tel: +86 21 54341041

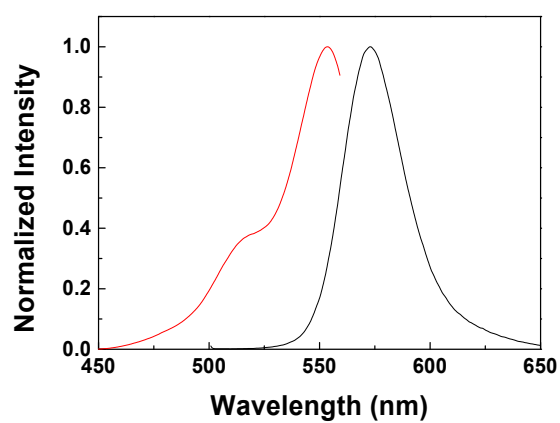

**Fig. S1.** The fluorescence excitation spectrum (red line) of rhodamine B-doped silica nanoparticles (RB-FSNPs) and their fluorescence emission spectrum (black line) excited at 488 nm.
